# Supplementary material
Source: PubMed Central journal article supplement (PMC6277021)
Supplement: NIHMS939269-supplement-SI.pdf [file NIHMS939269-supplement-SI.pdf]

## Supporting Information

### **Biomaterialized matrices dominate soluble cues to direct osteogenic differentiation of human mesenchymal stem cells through adenosine signaling**

Heemin Kang,<sup>†,§</sup> Yu-Ru V. Shih,<sup>†</sup> and Shyni Varghese<sup>\*,†,§</sup>

<sup>†</sup> Department of Bioengineering, University of California, San Diego, La Jolla, CA 92093, USA.

<sup>§</sup> Materials Science and Engineering Program, University of California, San Diego, La Jolla, CA 92093, USA.

**Supporting Figure S1.** Adhesion and growth of hMSCs on various matrices in different medium conditions. The cells on different matrices (non-mineralized matrices [NM], mineralized matrices [M], and coverslips [CS]) and medium conditions (growth medium [GM] or adipogenic medium [AM]) were imaged as a function of culture time (1, 5, 10, and 14 days). The cells were labeled with CellTracker. Scale bars indicate 100  $\mu\text{m}$ .

**Supporting Table S1.** List of primer sequences used in quantitative PCR analyses.



# Supporting Figure S1

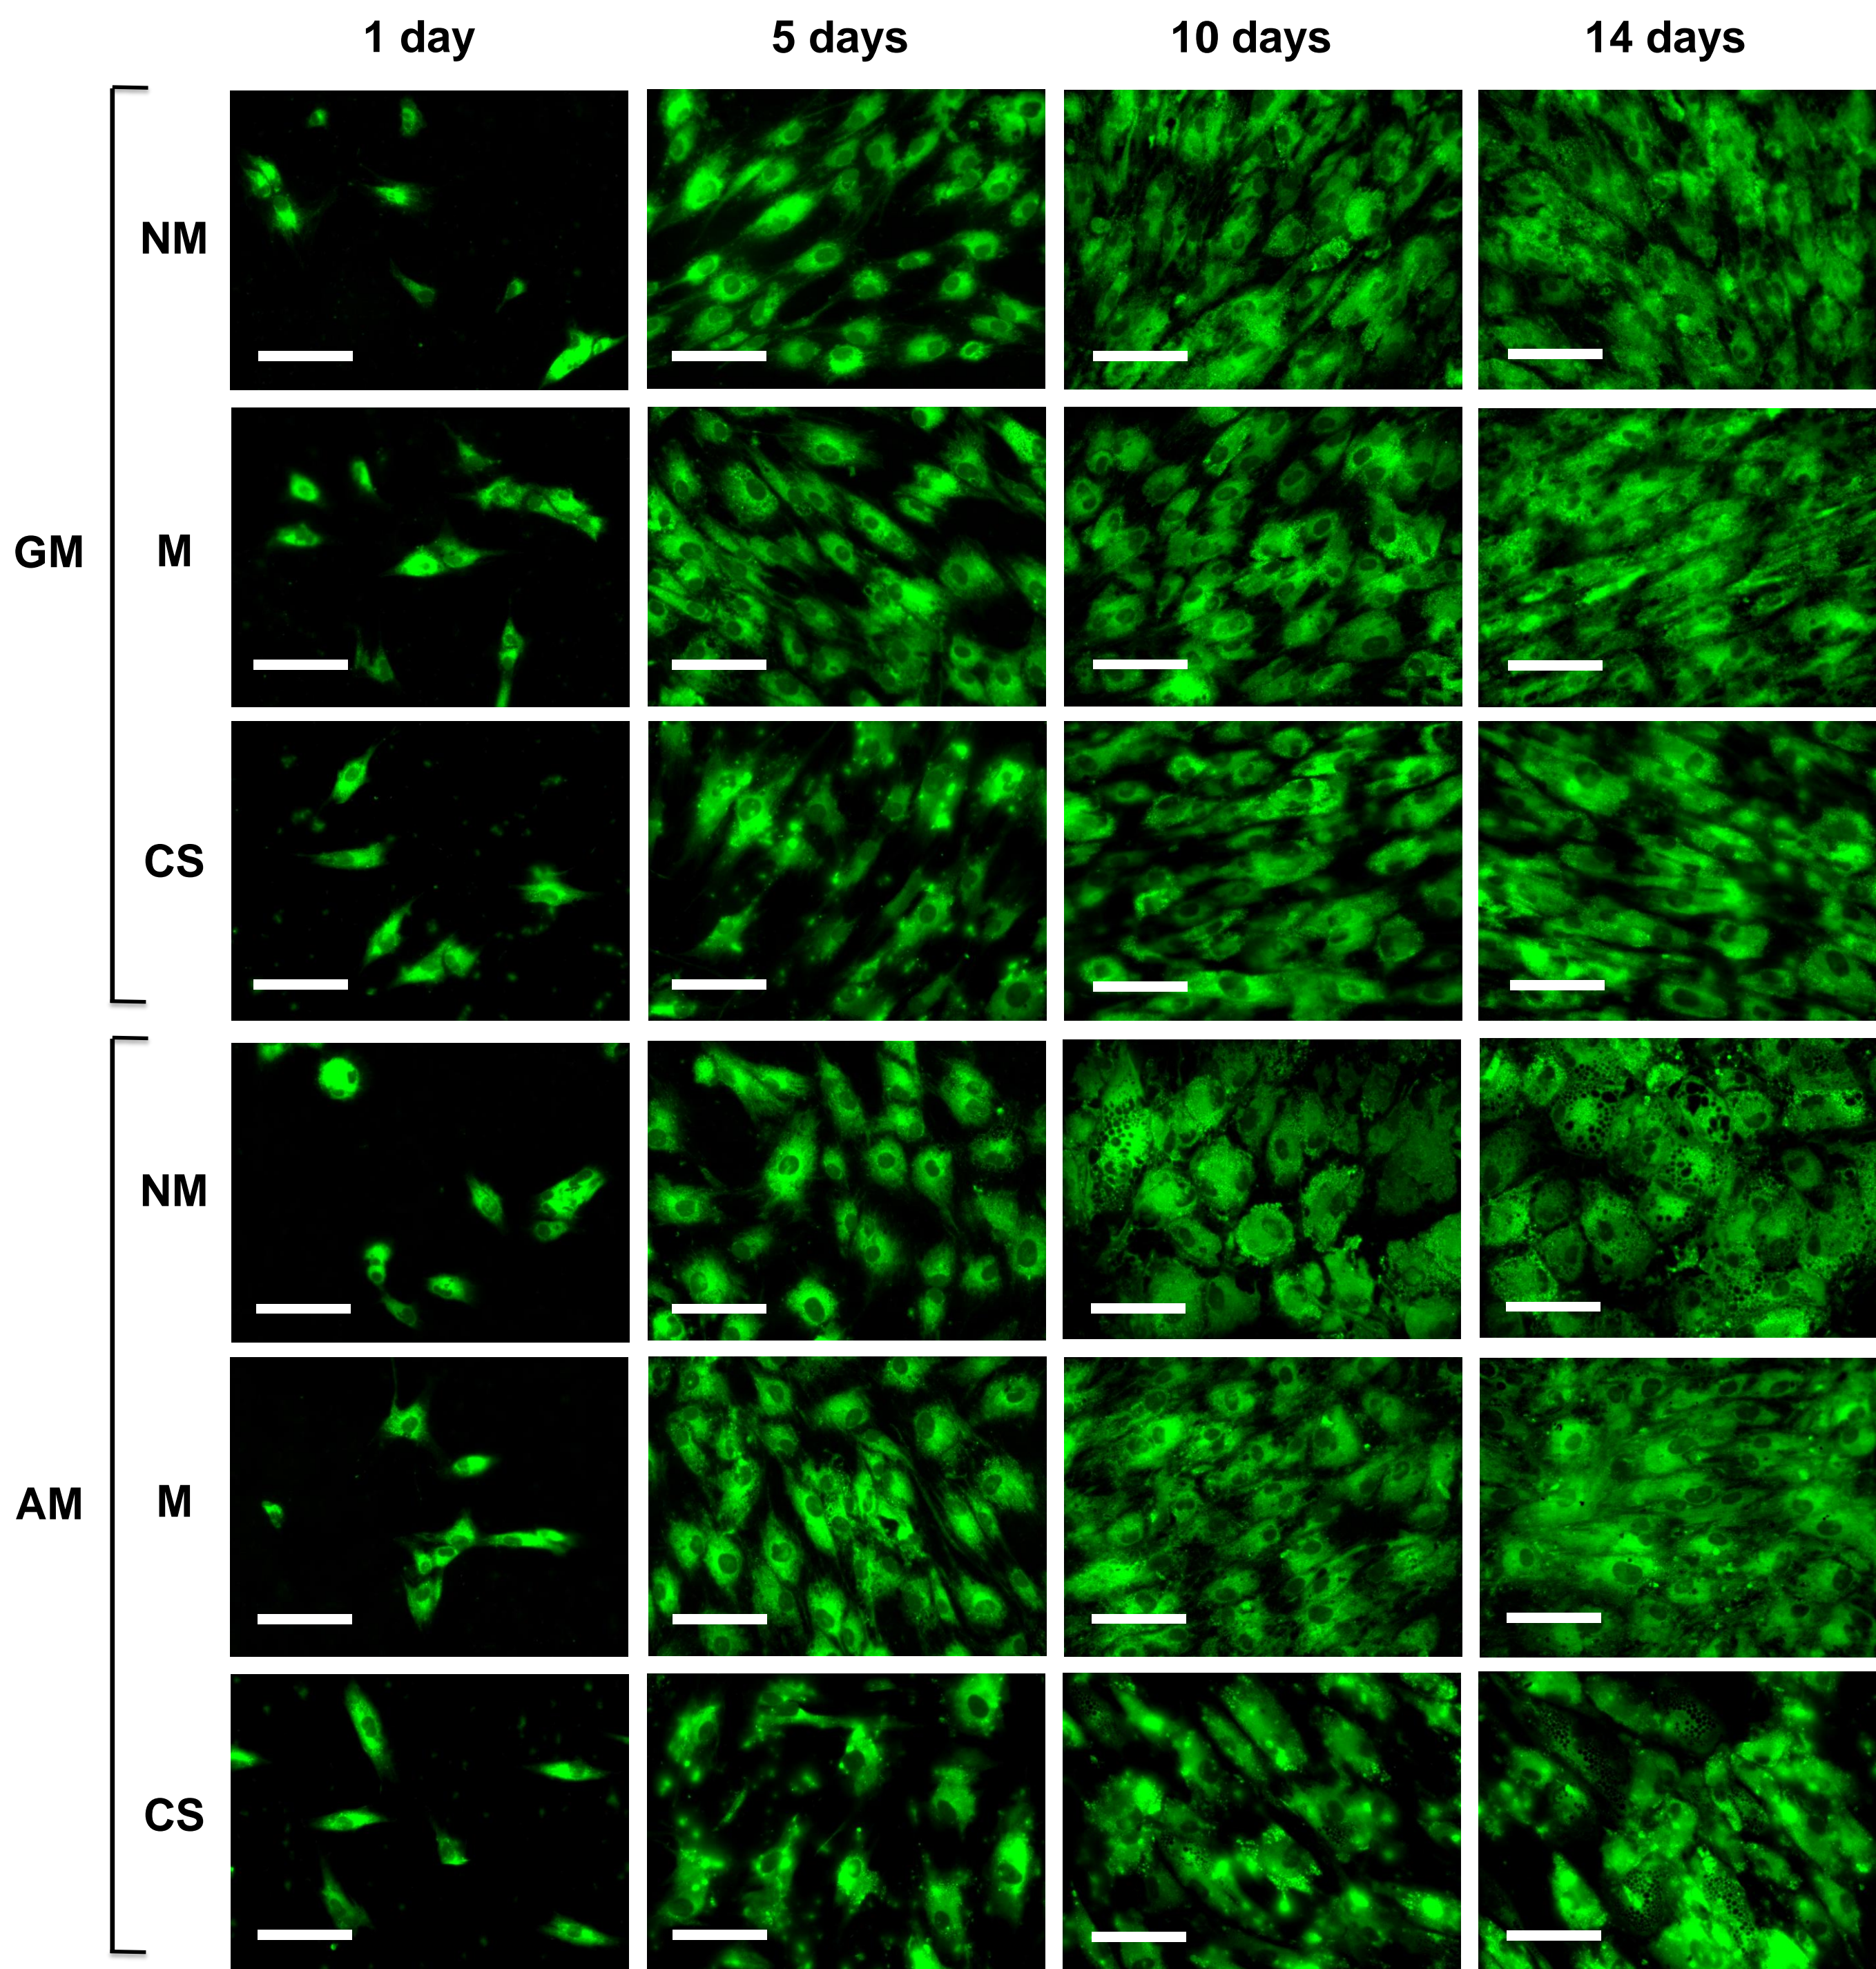



## Supporting Table S1

| Gene                                                                 | Primer Sequence                              |
|----------------------------------------------------------------------|----------------------------------------------|
| Glyceraldehyde 3-phosphate dehydrogenase (GAPDH)                     | Forward: 5' CAT CAA GAA GGT GGT GAA GC 3'    |
|                                                                      | Reverse: 5' GTT GTC ATA CCA GGA AAT GAG C 3' |
| Runt-related transcription factor 2 (RUNX2)                          | Forward: 5' CCA CCC GGC CGA ACT GGT CC 3'    |
|                                                                      | Reverse: 5' CCT CGT CCG CTC CGG CCC ACA 3'   |
| Osteocalcin (OCN)                                                    | Forward: 5' GAA GCC CAG CGG TGC A 3'         |
|                                                                      | Reverse: 5' CAC TAC CTC GCT GCC CTC C 3'     |
| Bone sialoprotein (BSP)                                              | Forward: 5' AAT GAAAC GAA GAA AGC GAA G 3'   |
|                                                                      | Reverse: 5' ATC ATA GCC ATC GTA GCC TTG T 3' |
| Peroxisome proliferator-activated receptor-gamma2 (PPAR- $\gamma$ 2) | Forward: 5' GAA TGT CGT GTC TGT GGA GA 3'    |
|                                                                      | Reverse: 5' TGA GGA GAG TTA CTT GGT CG 3'    |
| Adipocyte fatty acid binding protein 2 ( $\alpha$ P2)                | Forward: 5' GTA CCT GGA AAC TTG TCT CC 3'    |
|                                                                      | Reverse: 5' GTT CAA TGC GAA CTT CAG TCC 3'   |
| Lipoprotein lipase (LPL)                                             | Forward: 5' GAG ATT TCT CTG TAT GGC ACC 3'   |
|                                                                      | Reverse: 5' CTG CAAATG AGA CAC TTT CTC 3'    |
